# Supplementary material for: Vermittlung kommunikativer Kompetenzen in der Lehre der HNO-Heilkunde
Source: Springer Nature journal article supplement (doi:10.1007/s00106-024-01475-2), 2024-04-10
Supplement: MOESM1 [file 26962988]

**Tabelle S1** Selbsteinschätzung zu kommunikativen Kompetenzen vor und nach dem Kurs

|                                                   | <b>N</b><br><b>(P)</b> | <b>t1 (M)</b><br><b>(P)</b> | <b>t1 (SD)</b><br><b>(P)</b> | <b>t2 (M)</b><br><b>(P)</b> | <b>t2 (SD)</b><br><b>(P)</b> | <b>Δt1-t2</b><br><b>(M) (P)</b> | <b>Δt1-t2</b><br><b>(SD) (P)</b> | <b>N (O)</b> | <b>t1 (M)</b><br><b>(O)</b> | <b>t1 (SD)</b><br><b>(O)</b> | <b>t2 (M)</b><br><b>(O)</b> | <b>t2 (SD)</b><br><b>(O)</b> | <b>Δt1-t2</b><br><b>(M) (O)</b> | <b>Δt1-t2</b><br><b>(SD) (O)</b> | <b>p</b> |
|---------------------------------------------------|------------------------|-----------------------------|------------------------------|-----------------------------|------------------------------|---------------------------------|----------------------------------|--------------|-----------------------------|------------------------------|-----------------------------|------------------------------|---------------------------------|----------------------------------|----------|
| <b>1. Kontaktaufnahme</b>                         | 108                    | 3.35                        | 1.86                         | 2.82                        | 1.50                         | 0.53                            | 1.76                             | 25           | 3.95                        | 2.31                         | 2.31                        | 1.39                         | 1.64                            | 2.12                             | 0.007    |
| <b>2. Selbstbewusstsein</b>                       | 108                    | 4.33                        | 1.66                         | 3.65                        | 1.80                         | 0.68                            | 1.57                             | 25           | 4.18                        | 2.06                         | 2.55                        | 1.28                         | 1.63                            | 1.98                             | 0.010    |
| <b>3. Klare Strukturierung von Gesprächen</b>     | 108                    | 2.72                        | 1.54                         | 2.36                        | 1.45                         | 0.36                            | 1.41                             | 25           | 4.07                        | 1.62                         | 2.39                        | 1.45                         | 1.68                            | 1.51                             | <0.001   |
| <b>4. Angemessene Sprache</b>                     | 108                    | 3.76                        | 1.64                         | 3.01                        | 1.61                         | 0.75                            | 1.53                             | 25           | 3.30                        | 1.58                         | 2.14                        | 1.45                         | 1.16                            | 1.69                             | 0.240    |
| <b>5. Blickkontakt</b>                            | 108                    | 3.43                        | 1.46                         | 3.39                        | 1.68                         | 0.04                            | 1.69                             | 25           | 2.61                        | 1.62                         | 1.46                        | 1.13                         | 1.14                            | 1.57                             | 0.004    |
| <b>6. Zugewandte Körperhaltung</b>                | 108                    | 2.18                        | 1.73                         | 1.84                        | 1.51                         | 0.35                            | 1.67                             | 25           | 2.31                        | 1.33                         | 1.54                        | 0.77                         | 0.77                            | 1.38                             | 0.239    |
| <b>7. Angemessene Pausen</b>                      | 108                    | 2.01                        | 1.73                         | 1.98                        | 1.59                         | 0.03                            | 1.66                             | 25           | 3.48                        | 1.94                         | 1.97                        | 1.18                         | 1.52                            | 1.53                             | <0.001   |
| <b>8. Kurze Sätze</b>                             | 108                    | 4.07                        | 1.81                         | 3.18                        | 1.67                         | 0.89                            | 1.69                             | 25           | 3.57                        | 1.71                         | 2.26                        | 1.14                         | 1.32                            | 1.64                             | 0.260    |
| <b>9. Angemessene Verwendung von Hilfsmitteln</b> | 108                    | 4.63                        | 1.92                         | 3.56                        | 1.81                         | 1.07                            | 1.93                             | 25           | 3.97                        | 1.89                         | 2.44                        | 1.85                         | 1.53                            | 1.80                             | 0.276    |
| <b>10. Verständnis durch Patient*innen</b>        | 108                    | 4.12                        | 1.89                         | 2.91                        | 1.60                         | 1.21                            | 1.83                             | 25           | 3.55                        | 1.40                         | 2.25                        | 1.67                         | 1.30                            | 1.33                             | 0.821    |
| <b>11. Angemessener Gesprächsabschluss</b>        | 108                    | 4.11                        | 1.71                         | 3.02                        | 1.44                         | 1.09                            | 1.68                             | 25           | 3.57                        | 1.64                         | 2.38                        | 1.54                         | 1.19                            | 1.34                             | 0.789    |

|                                                                    |     |      |      |      |      |      |      |    |      |      |      |      |      |      |        |
|--------------------------------------------------------------------|-----|------|------|------|------|------|------|----|------|------|------|------|------|------|--------|
| <b>12. Erkennen der Emotionen der Patient*innen</b>                | 108 | 4.11 | 1.92 | 3.50 | 1.82 | 0.61 | 2.04 | 25 | 2.85 | 1.45 | 2.14 | 1.65 | 0.71 | 1.66 | 0.818  |
| <b>13. Emotionale Unterstützung der Patient*innen</b>              | 108 | 3.90 | 1.31 | 3.52 | 1.41 | 0.38 | 1.15 | 25 | 3.63 | 1.69 | 2.26 | 1.23 | 1.37 | 1.85 | 0.016  |
| <b>14. Qualität des Gesprächs</b>                                  | 108 | 4.00 | 1.66 | 3.62 | 1.61 | 0.38 | 1.74 | 25 | 4.02 | 1.42 | 2.48 | 0.94 | 1.54 | 1.34 | 0.002  |
| <b>15. Theoretische Kenntnisse über Gespräche in HNO-Heilkunde</b> | 108 | 5.73 | 1.75 | 3.38 | 1.69 | 2.35 | 1.95 | 25 | 5.70 | 2.99 | 2.30 | 1.71 | 3.40 | 2.89 | 0.094  |
| <b>16. Anwendung theoretischen Wissens</b>                         | 108 | 5.02 | 1.70 | 3.72 | 1.60 | 1.30 | 1.62 | 25 | 5.08 | 2.34 | 2.35 | 1.51 | 2.73 | 2.14 | <0.001 |

FR=Frageummer, N= Zahl der Probanden, M= Mittelwert, SD= Standardabweichung,  $p$ = Signifikanz Mittelwerte, P=Präsenz-Gruppe, O=Online-Gruppe, T1= prä-Befragung, T2= post-Befragung,  $\Delta$ T1-T2= Differenz Selbsteinschätzung, 10-Punkte-Skala: 1 „sehr sicher“ und 10 „sehr unsicher“
